# Supplementary material
Source: HighWire-hosted journal article supplement (https://svn.smart01.highwire.org/content/9/6/604)
Supplement: inline-supplementary-material-2 [file inline-supplementary-material-2.pdf]

## Supplement 2

eFigure 1. Participant flow diagram

eFigure 2. Comparison of hemorrhage grades as per Heidelberg Bleeding Classification between groups

eFigure 3. Kaplan-Meier curve showing time to death compared between groups.

eTable 1. Comparison of NIHSS scores between groups

eFigure 1. Participant flow diagram

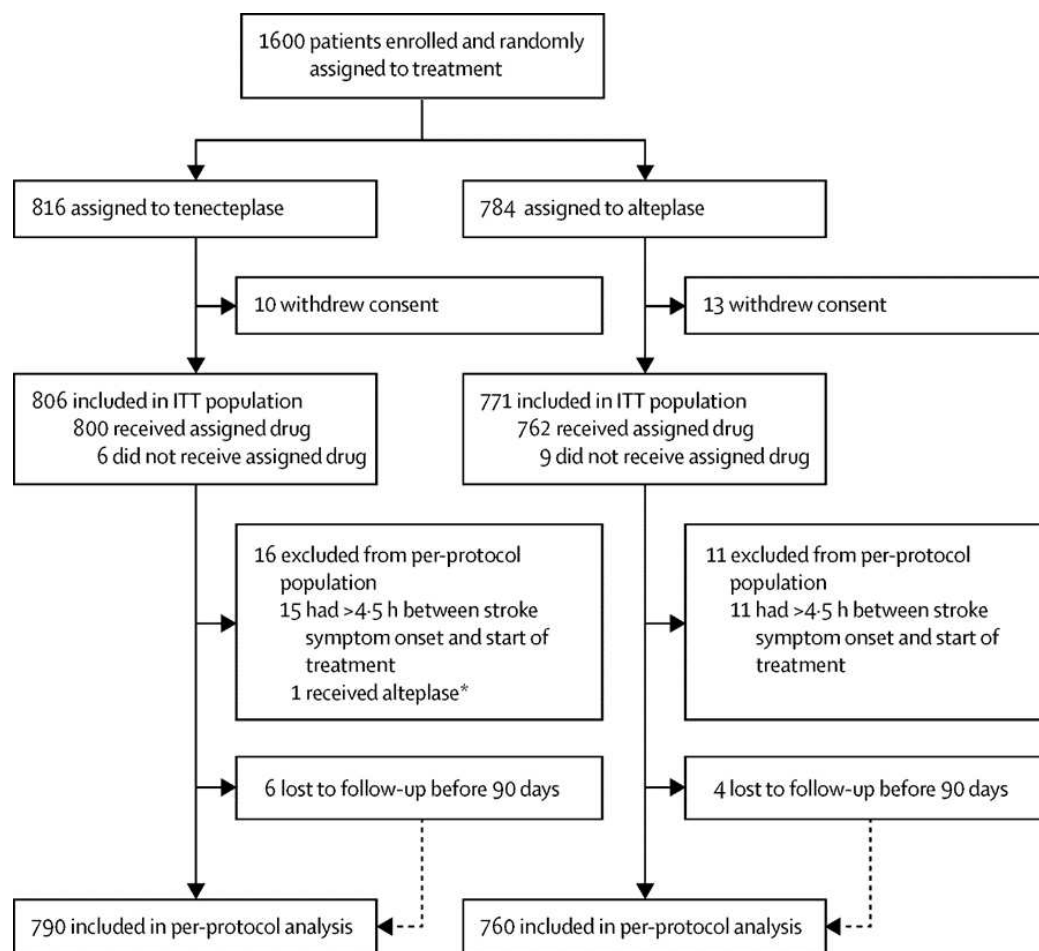

ITT=intention-to-treat. \*The one patient who crossed over and received alteplase instead of tenecteplase were included in the alteplase group for safety analysis.

eFigure 2. Comparison of hemorrhage grades as per Heidelberg Bleeding Classification between alteplase and tenecteplase in minor stroke (NIHSS ≤ 5).

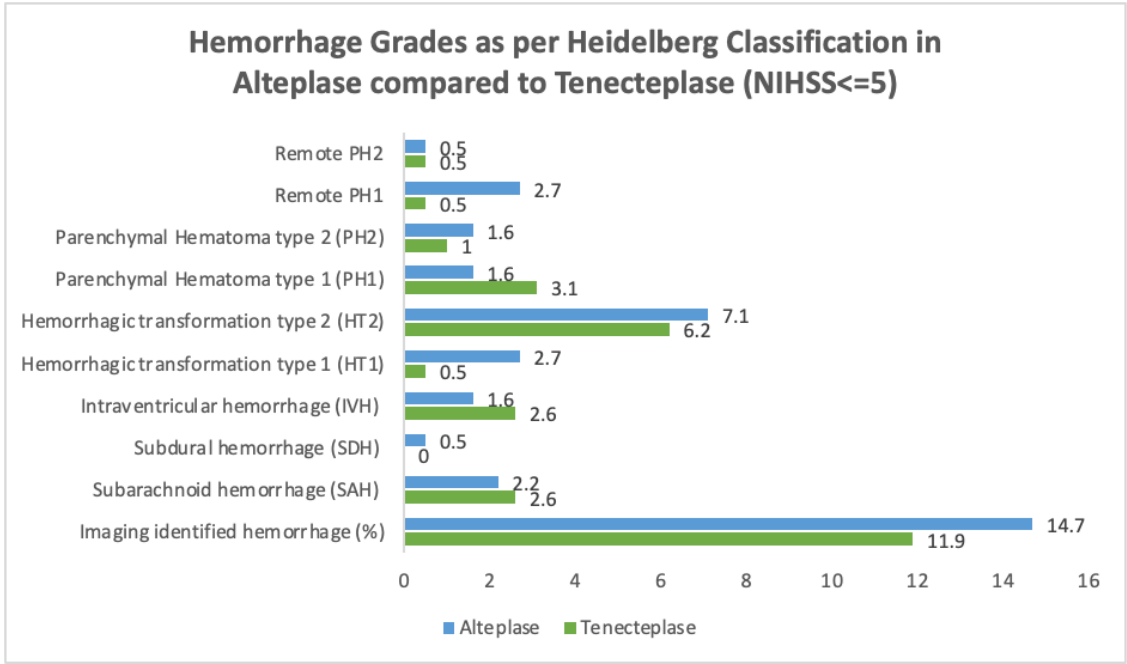

eFigure 3. Kaplan-Meier curve showing time to death in alteplase vs tenecteplase group.

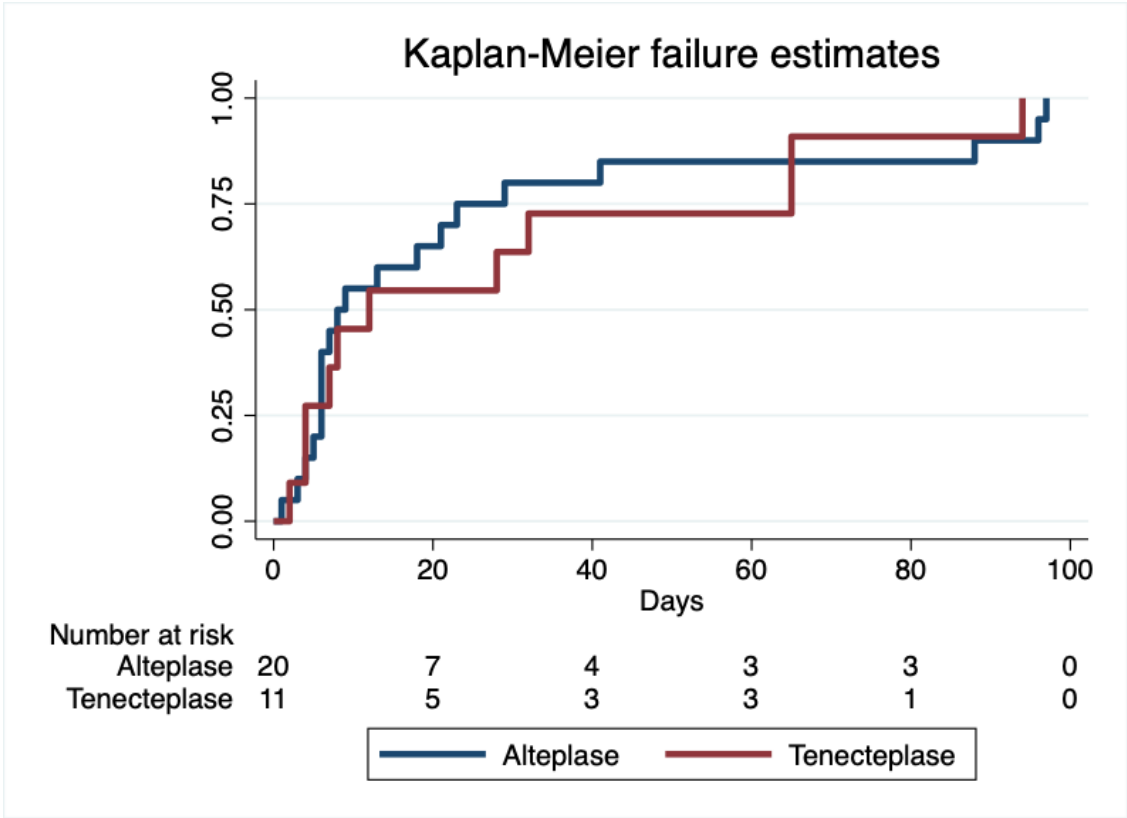

eTable 1. Comparison of NIHSS scores between groups

|                    |              |               |
|--------------------|--------------|---------------|
| Alteplase group    |              |               |
| NIHSS              | n (%)        | mRS 0-1,<br>n |
| 0                  | 2 (1.1)      | 0             |
| 1                  | 8 (4.4)      | 5             |
| 2                  | 14 (7.6)     | 6             |
| 3                  | 41<br>(22.3) | 19            |
| 4                  | 57<br>(31.0) | 28            |
| 5                  | 62<br>(33.7) | 28            |
| Tenecteplase group |              |               |
| NIHSS              | n (%)        | mRS 0-1,<br>n |
| 0                  | 8 (4.1)      | 5             |
| 1                  | 7 (3.6)      | 3             |
| 2                  | 25<br>(12.9) | 11            |
| 3                  | 47<br>(24.2) | 25            |
| 4                  | 45<br>(23.2) | 23            |
| 5                  | 62<br>(32.0) | 33            |
